# Supplementary material for: Electrophoretic deposition of hierarchical Co3O4@graphene hybrid films as binder-free anodes for high-performance lithium-ion batteries
Source: Royal Society of Chemistry journal article supplement (doi:10.1039/c5ra02302e), 2015-01-01
Supplement: c5ra02302e1.pdf [file c5ra02302e1.pdf]

# Supporting Information

## Electrophoretic deposition of hierarchical $\text{Co}_3\text{O}_4$ @graphene hybrid films as binder-free anodes for high-performance lithium-ion batteries

Xiaoyu Wu, Bo Wang, Songmei Li\*, Jianhua Liu, Mei Yu

*Key Laboratory of Aerospace Advanced Materials and Performance of Ministry of  
Education, School of Materials Science and Engineering, Beihang University, Beijing,  
100191, P. R. China*

*Fax: +86-10-82317103; Tel: +86-10-82317103; E-mail: [songmei\\_li@buaa.edu.cn](mailto:songmei_li@buaa.edu.cn)*

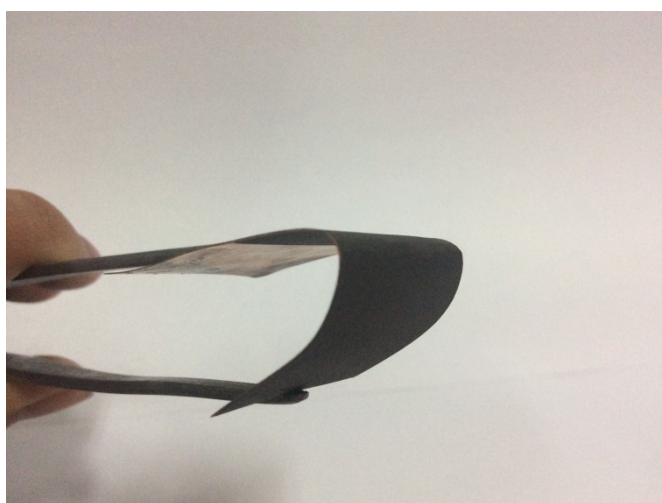

Fig. S1 Optical image of  $\text{Co}_3\text{O}_4$ @graphene-2 hybrid films deposited on copper foil under bending.

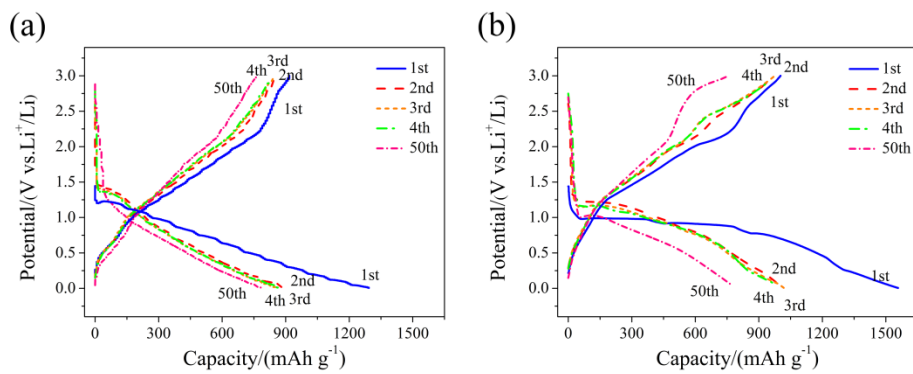

Fig. S2 Charge-discharge voltage profiles of (a)  $\text{Co}_3\text{O}_4@\text{graphene-1}$  and (b)  $\text{Co}_3\text{O}_4@\text{graphene-3}$  electrodes at a current density of  $500 \text{ mA g}^{-1}$
